# Supplementary material for: Inherent N,O-containing carbon frameworks as electrode materials for high-performance supercapacitors
Source: Royal Society of Chemistry journal article supplement (doi:10.1039/c6nr05146d), 2016-01-01
Supplement: c6nr05146d1.pdf [file c6nr05146d1.pdf]

## Supporting Information

### Inherent N,O-Containing Carbon Frameworks as Electrode Materials for High-Performance Supercapacitors

Fangyuan Hu,<sup>a</sup> Jinyan Wang,<sup>a</sup> Shui Hu,<sup>a</sup> Linfei Li,<sup>a</sup> Gang Wang,<sup>b</sup> Jieshan Qiu<sup>b</sup>, Xigao Jian<sup>a\*</sup>

<sup>a</sup> F. Hu, J. Wang, S. Hu, L. Li, Prof. X. Jian

Liaoning Province Engineering Centre of High Performance Resins, Dalian University of Technology, Dalian; State Key Laboratory of Fine Chemicals, Dalian University of Technology, Dalian, 116024, China. E-mail: jian4616@dlut.edu.cn

<sup>b</sup> G. Wang, Prof. J. Qiu

Carbon Research Laboratory, Liaoning Key Lab for Energy Materials and Chemical Engineering, Dalian University of Technology, Dalian, 116024, China.

#### Experimental

**Materials.** All starting materials, except for 4,4'-(1,5-dioxo-4,8-diphenyl-2,3,6,7-tetraazaanthracene-diyl)dibenzonitrile (DPDN), were purchased commercially and used without further purification.

**Synthesis of 4,4'-(1,5-dioxo-4,8-diphenyl-2,3,6,7-tetraazaanthracene-diyl) dibenzonitrile (DPDN).**

**2,3,7,8-Tetraazaanthracenedione.** It was prepared based on the existing report,<sup>1,2</sup> yield 90%. <sup>1</sup>H-NMR (500 MHz, DMSO-*d*<sub>6</sub>) δ 7.45-7.70 (m, ~12H), 8.05 (s, 1H), 8.55 (s, 0.4H) 9.18 (s, 1H), 13.14 (s, ~2H); TOF MS EI<sup>+</sup> calcd for C<sub>22</sub>H<sub>14</sub>N<sub>4</sub>O<sub>2</sub>: 366.1117; Found: 366.1106. Anal. Calcd for C<sub>22</sub>H<sub>14</sub>N<sub>4</sub>O<sub>2</sub>: C, 72.12; H, 3.85; N, 15.29. Found: C, 72.36; H, 3.86; N, 15.68.

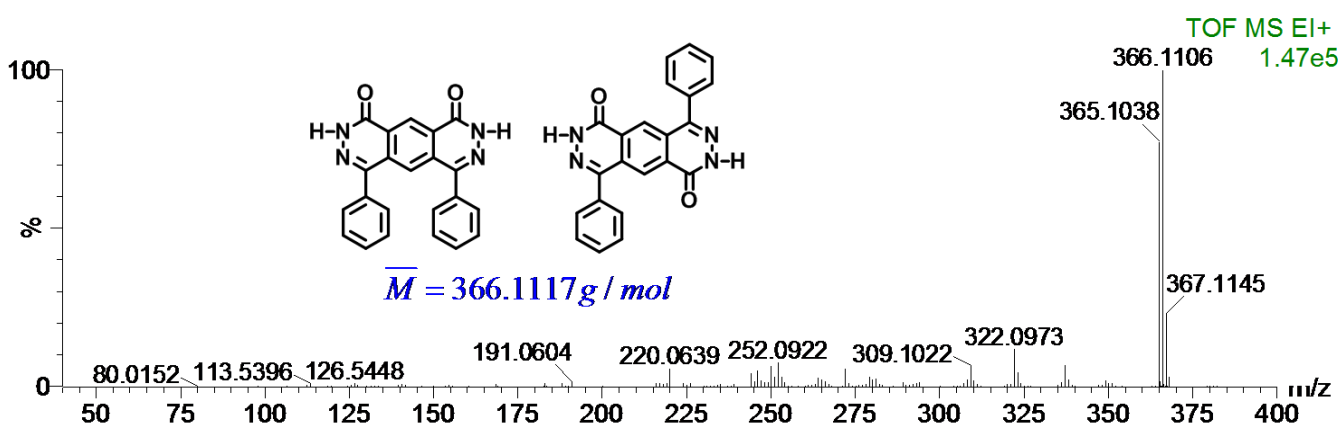

Fig. S1 The mass spectrum of 2,3,7,8-Tetraazaanthracenedione.

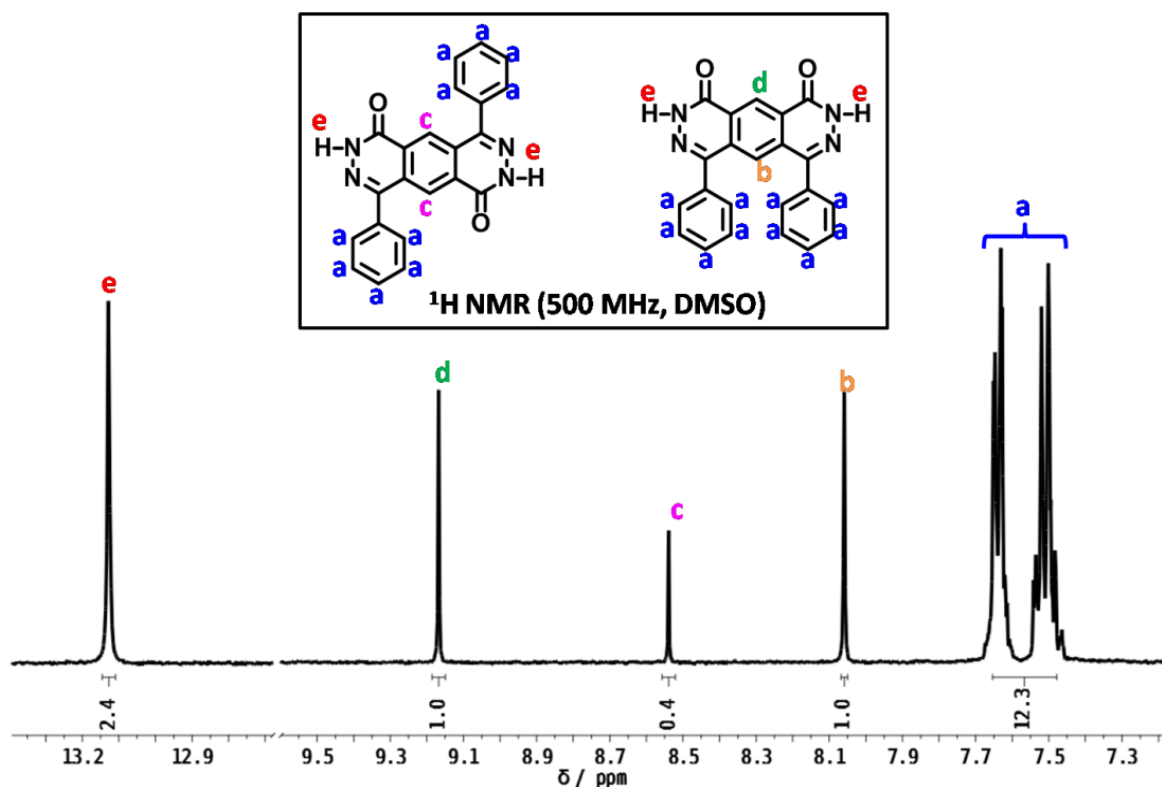

Fig. S2 The  $^1\text{H}$  NMR of 2,3,7,8-Tetraazaanthracenedione.

**4,4'-(dioxodiphenyl-2,3,6,7-tetraazaanthracene-diyl)dibenzonitrile (DPDN).** Dimethyl Sulphoxide (DMSO, 10mL) was stirred cautiously with 2,3,7,8-tetraazaanthracenedione (8 mmol) and 4-fluoro- benzonitrile (16 mmol) in a 100 mL round-bottom flask. Then, alkali halide (18 mmol) was added by stirring cautiously at 100 °C. Stirring at 170 °C was maintained for over 8 h. The resulting solution was poured into anhydrous ethanol. The solid was then filtered off, washed successively with acetone (5×30 mL) before drying at 80 °C. This yielded the product as an amorphous yellow solid, almost insoluble in common solvents, yield 93%, *m.p.*: 293, 310 °C (DSC);  $T_{d,max}$ : 500 °C (TGA);  $^1\text{H}$ -NMR (500 MHz, DMSO- $d_6$ )  $\delta$  7.50-7.54 (m, 5H), 7.56-7.60 (m, 4H), 7.68-7.70 (m, 6H), 7.94-7.96 (m, 12H), 8.08-8.10 (s, 1H), 8.63 (s, 1H) 9.35 (s, 1H); TOF MS  $\text{EI}^+$  calcd for  $\text{C}_{22}\text{H}_{14}\text{N}_4\text{O}_2$ : 568.1648; Found: 568.1655. Anal. Calcd for  $\text{C}_{36}\text{H}_{20}\text{N}_6\text{O}_2$ : C, 76.05; H, 3.55; N, 14.78. Found: C, 75.85; H, 3.55; N, 14.81.

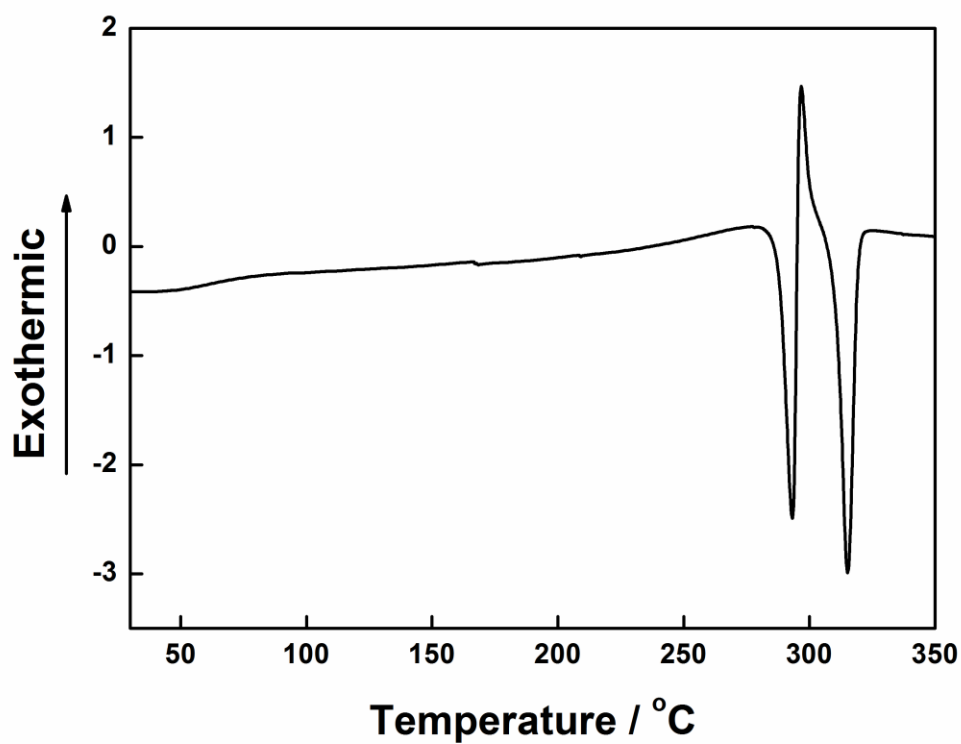

Fig. S3 The DSC curve of DPDN.

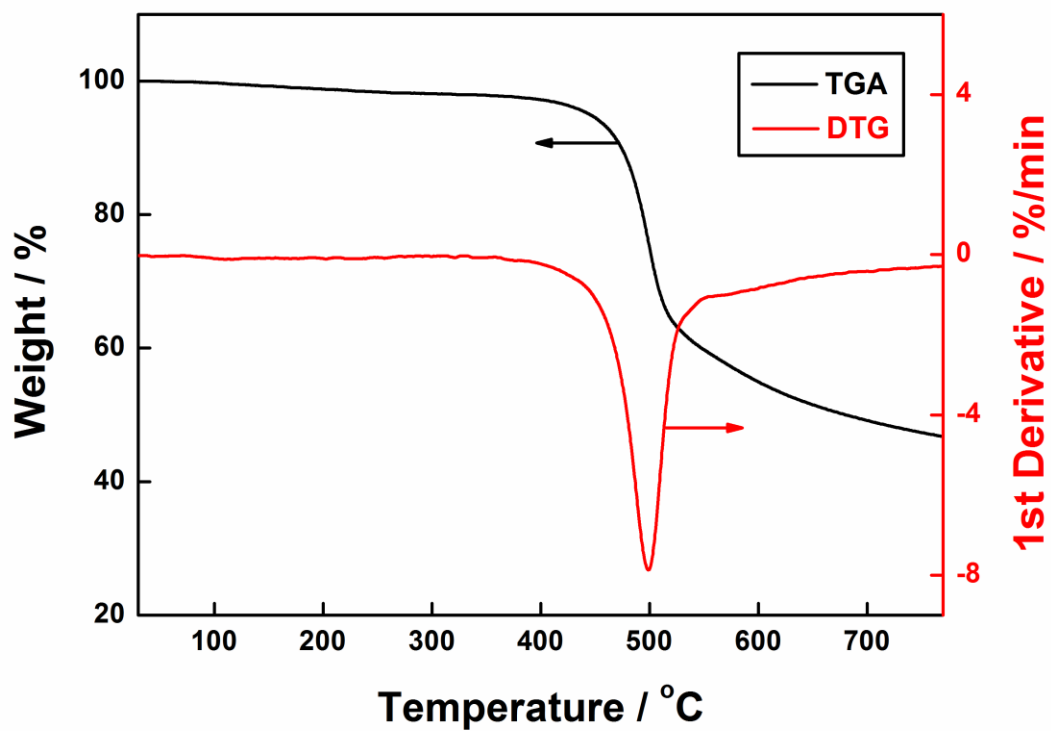

Fig. S4 The TGA and DTG curves of DPDN.

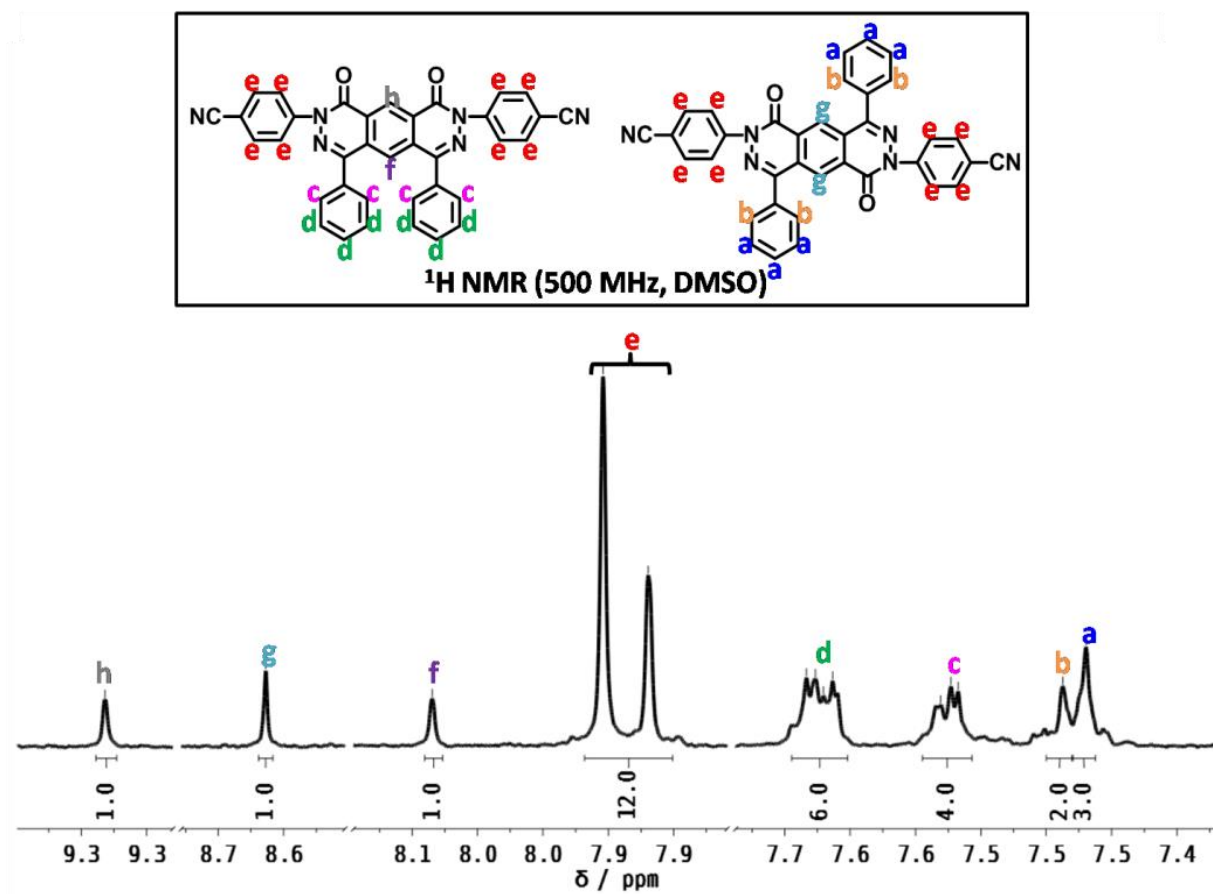

Fig. S5 The <sup>1</sup>H NMR of DPDN.

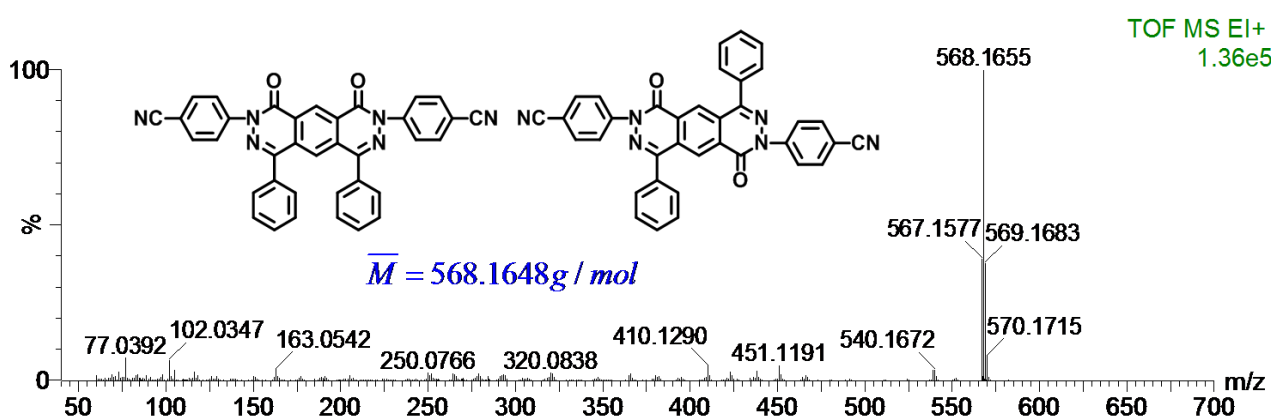

Fig. S6 The mass spectrum of DPDN.

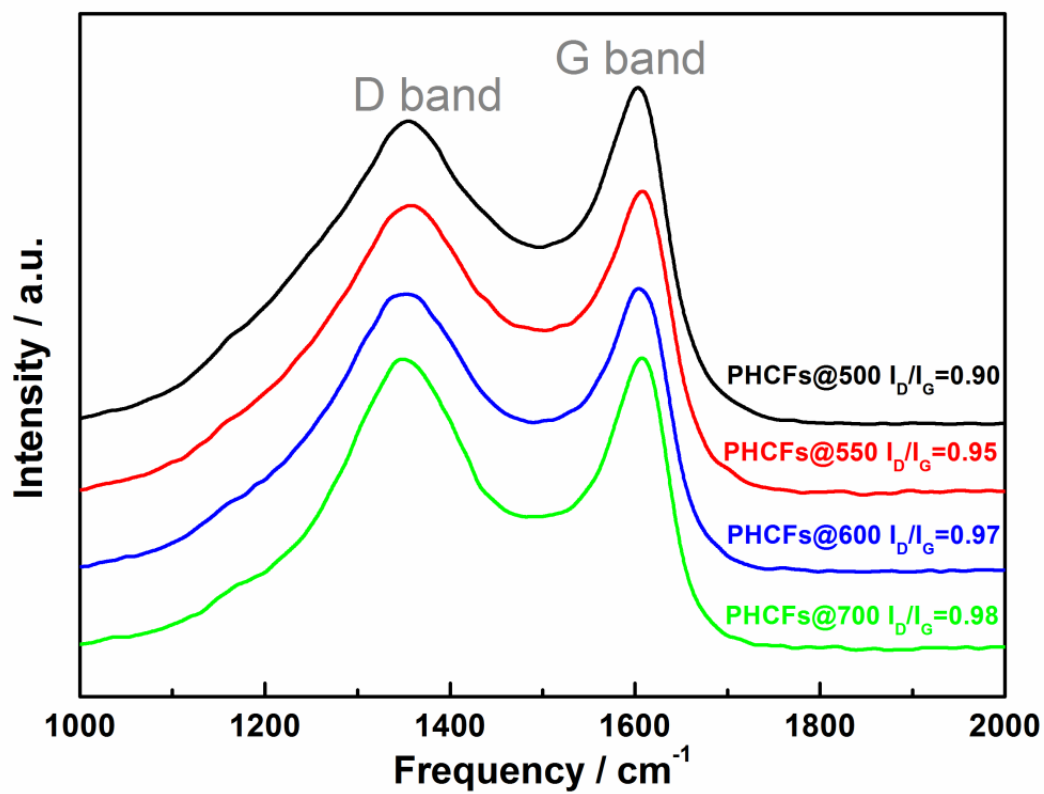

Fig. S7 Raman spectra of PHCFs.

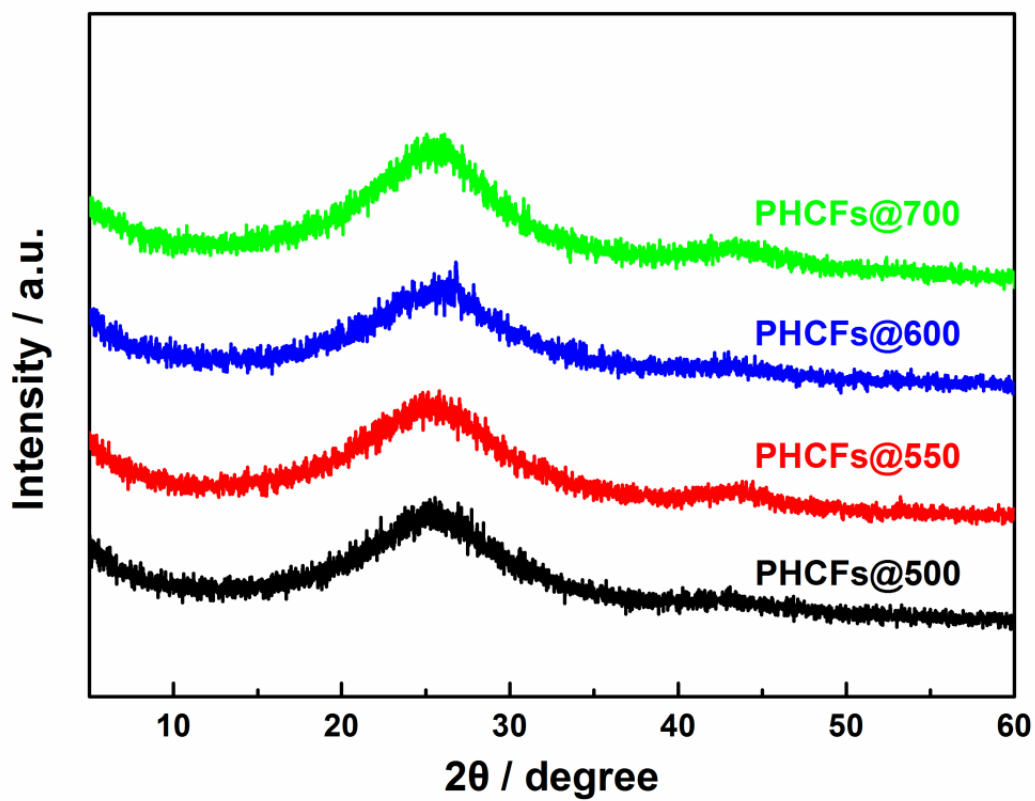

Fig. S8. X-ray diffraction patterns of PHCFs.

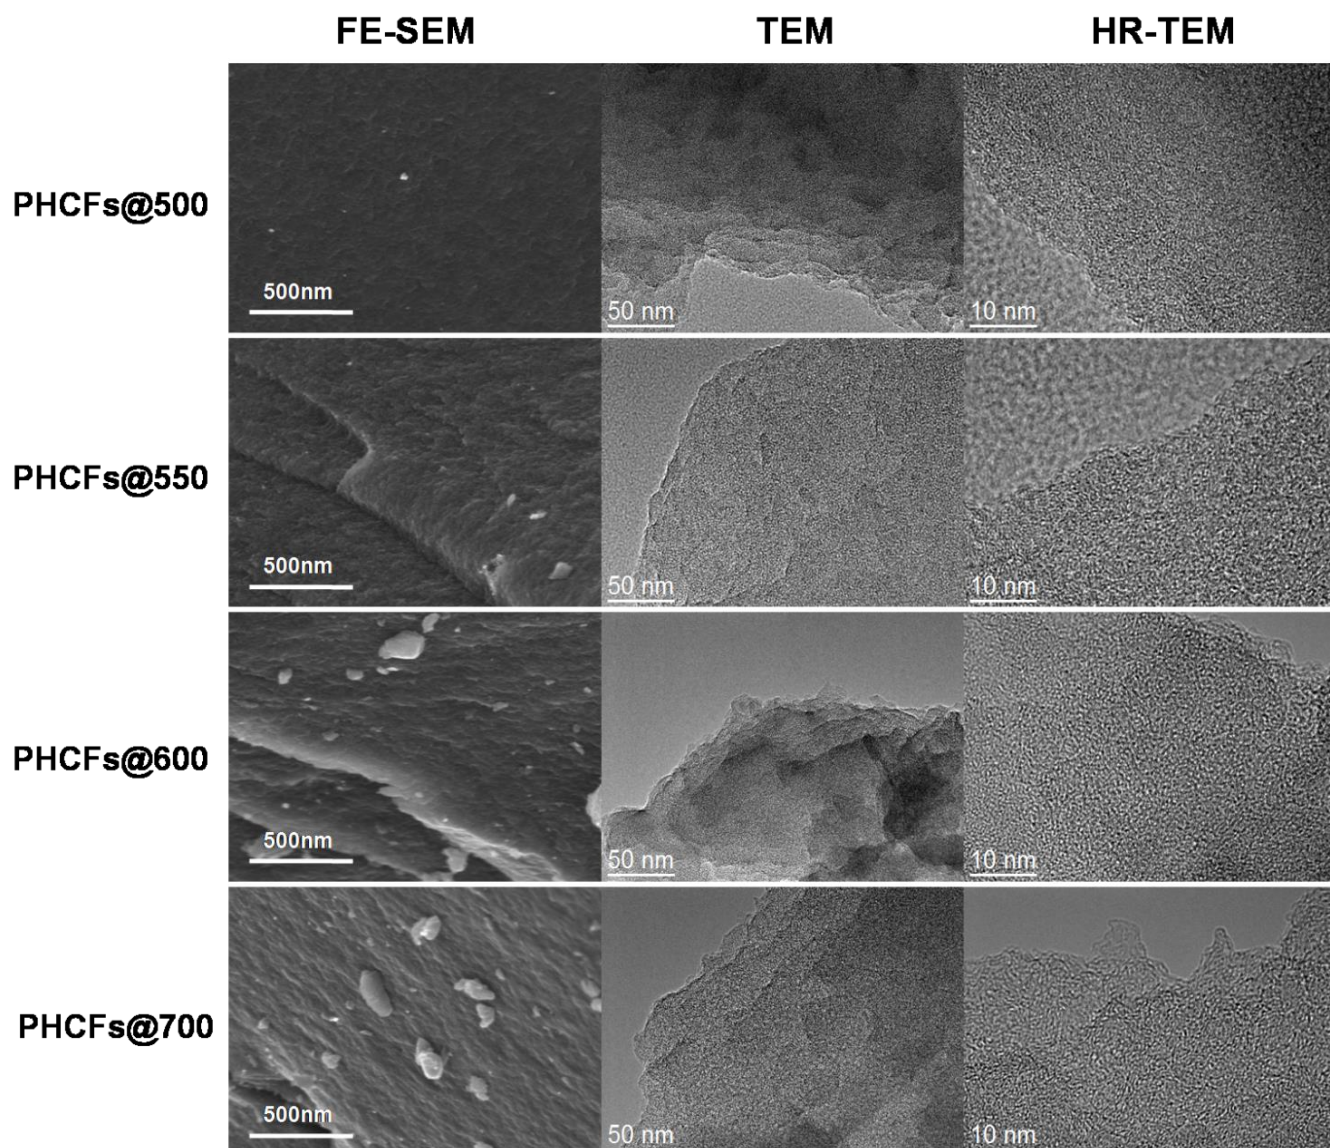

**Fig. S9** FE-SEM, TEM and HR-TEM images of PHCFs@500, PHCFs@550, PHCFs@600 and PHCFs@700.

**Table S1** Porosity measurement results of PHCFs.

| Samples   | BET surface area<br>( $\text{m}^2\text{g}^{-1}$ ) | Micropore Area<br>( $\text{m}^2\text{g}^{-1}$ ) | Average pore size<br>(nm) | Pore volume<br>( $\text{m}^3\text{g}^{-1}$ ) |
|-----------|---------------------------------------------------|-------------------------------------------------|---------------------------|----------------------------------------------|
| PHCFs@500 | 1103                                              | 767                                             | 1.9                       | 0.51                                         |
| PHCFs@550 | 1244                                              | 650                                             | 1.9                       | 0.65                                         |
| PHCFs@600 | 1149                                              | 684                                             | 1.9                       | 0.56                                         |
| PHCFs@700 | 1153                                              | 635                                             | 2.1                       | 0.55                                         |

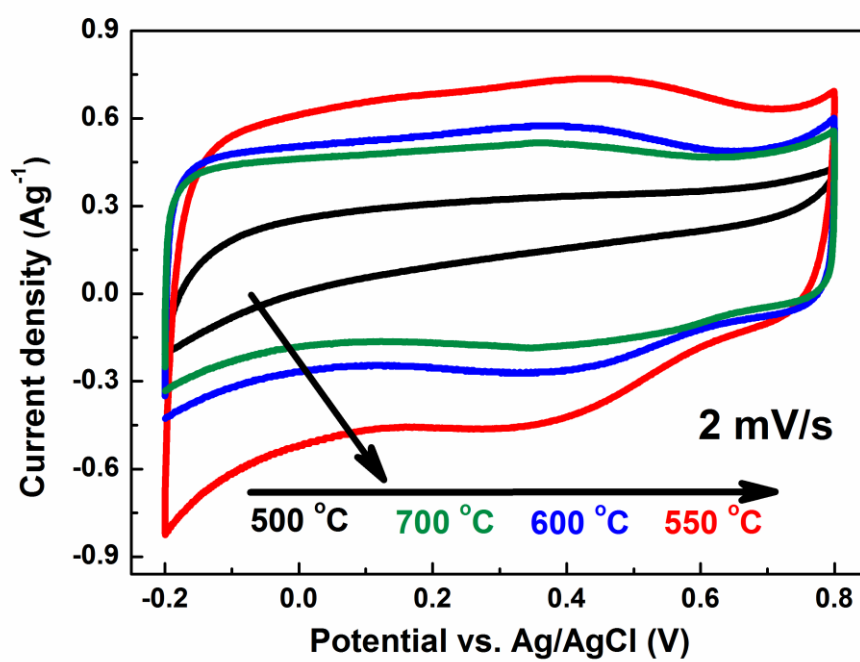

**Fig. S10** Cyclic voltammograms of PHCFs electrodes measured in a three-electrode system at 2mV/s.



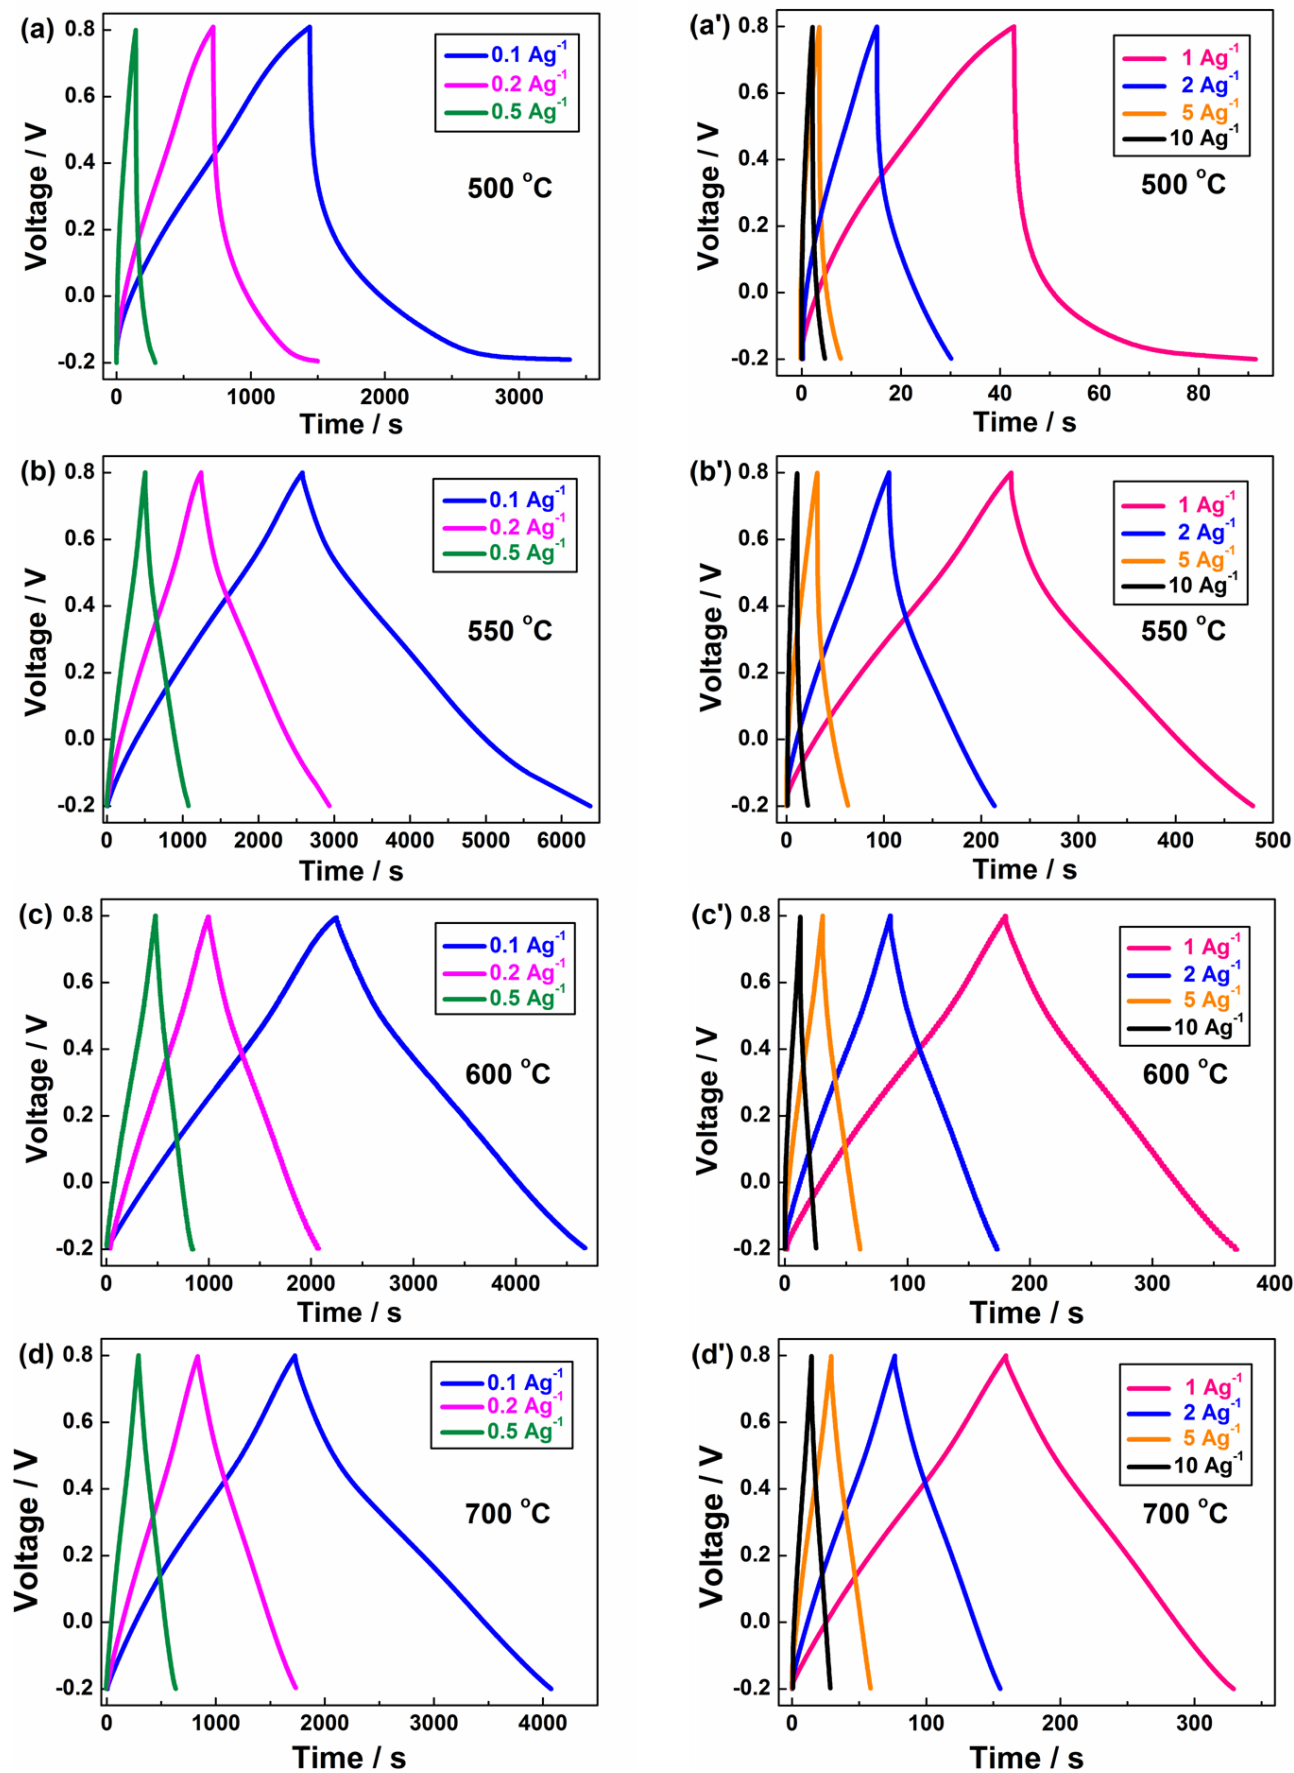

Fig. S11 Galvanostatic charge-discharge curves at different current densities (three-electrate system).



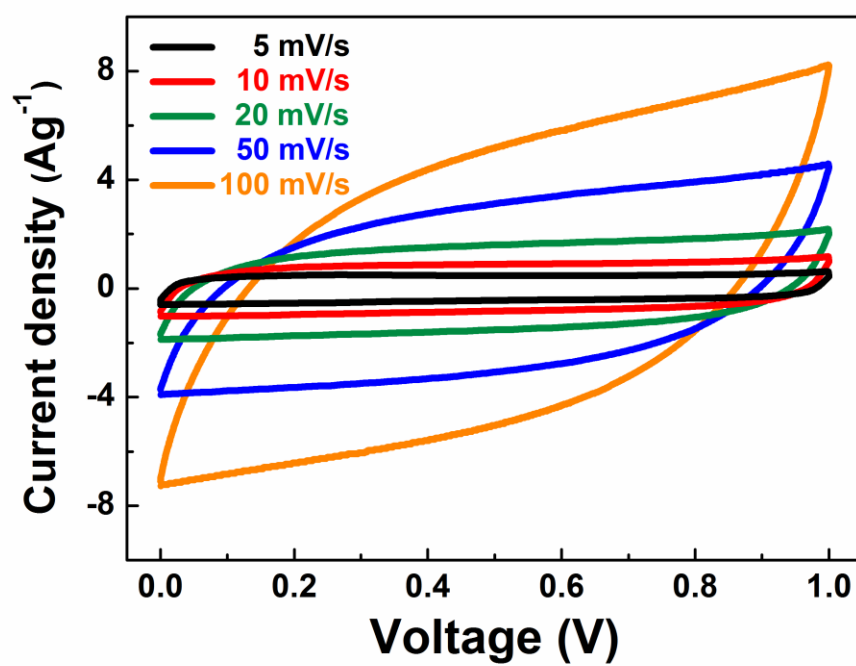

**Fig. S12** Cyclic voltammograms of PHCFs@600 electrodes measured in a two-electrode system at different current densities.

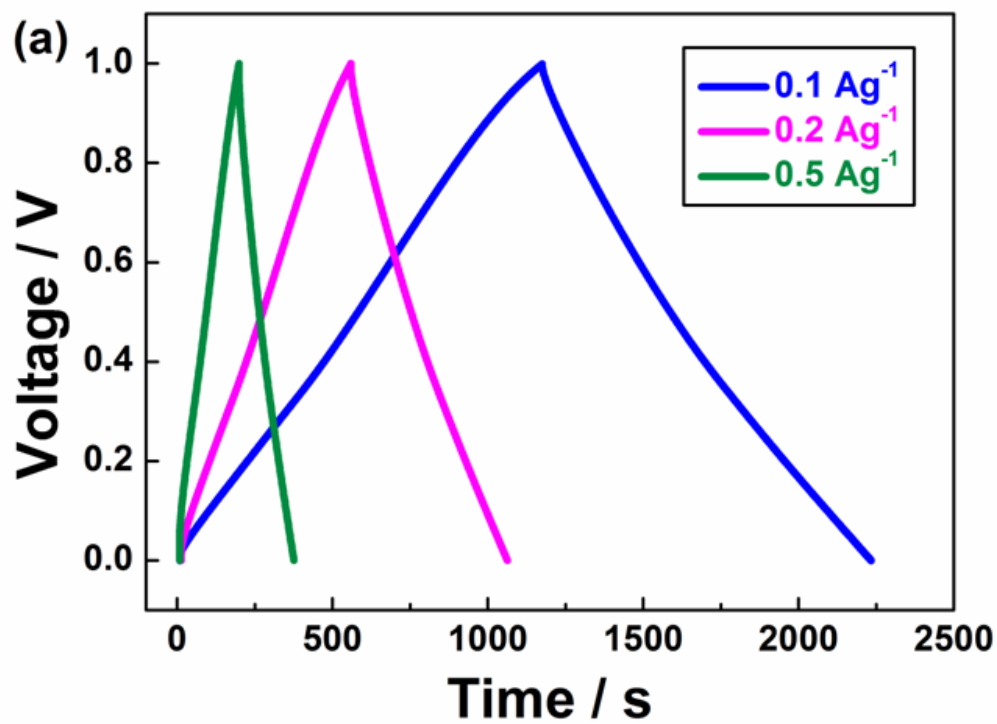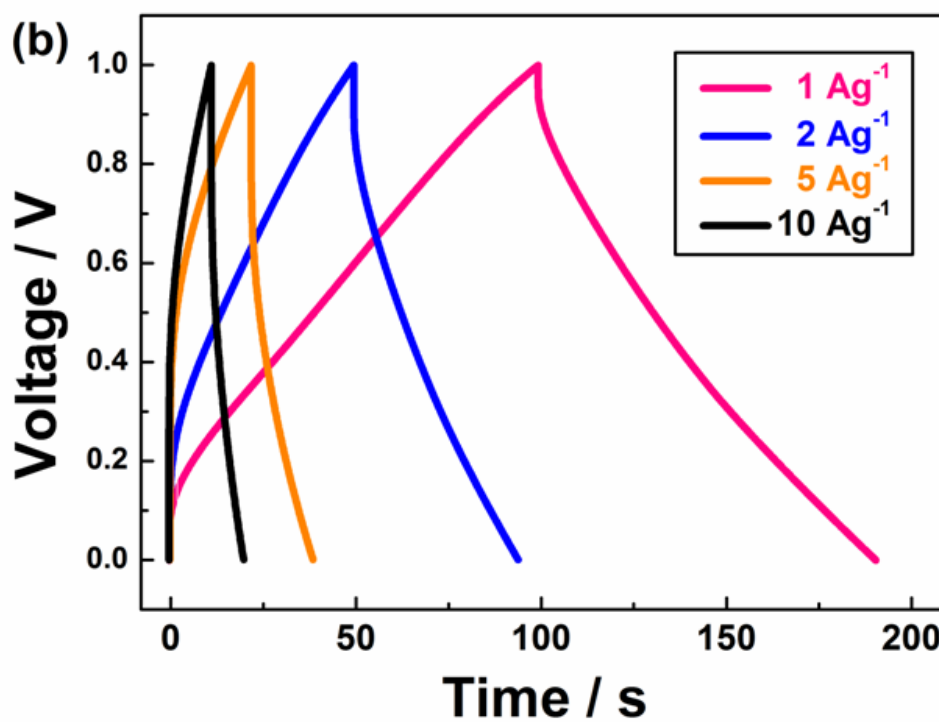

**Fig. S13** Galvanostatic charge-discharge curves of PHCFs@600 at different current densities (two-electrode system).

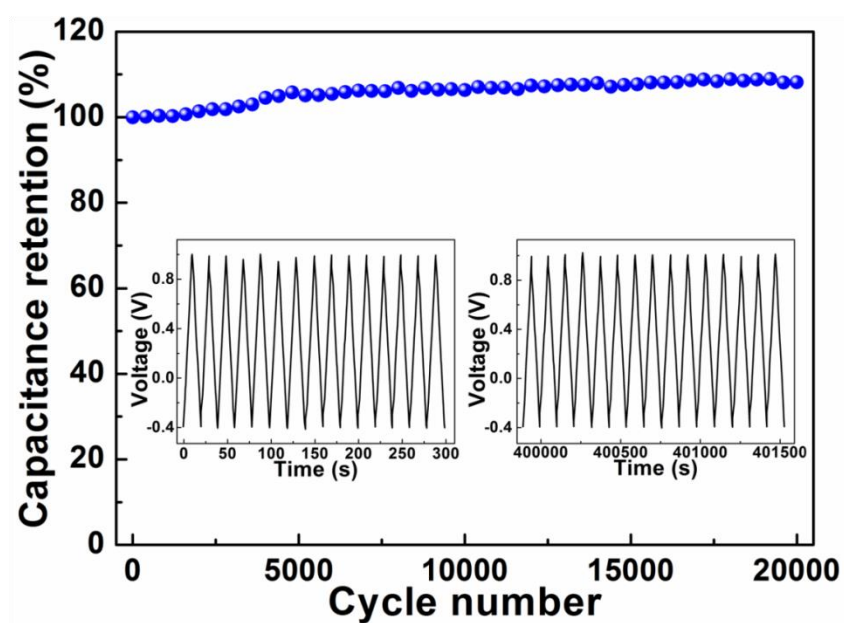

**Fig. S14** Cycle life tests with a two-electrode setup at  $10.0 \text{ A g}^{-1}$ . The first and last fifteen cycles of GC curves are shown in the inset.

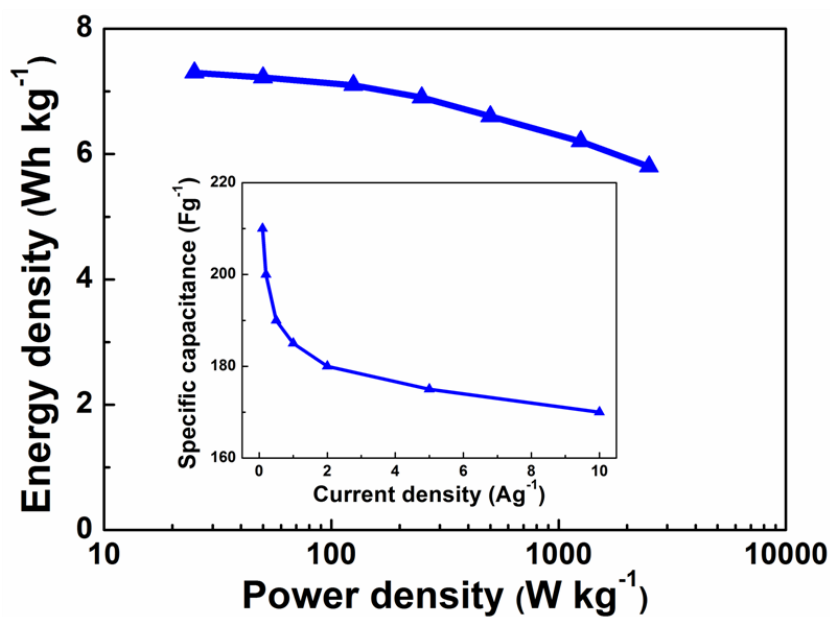

**Fig. S15** Ragone plots of PHCFs@600 with specific capacitances inserted.

## References

- 1 Y. Shu, A. S. Hay. *Macromolecules*, 1997, **30**, 2254.
- 2 Y. Shu, A. S. Hay. *Macromolecules*, 1995, **28**, 2579.
